# Supplementary material for: NEDDylation promotes nuclear protein aggregation and protects the Ubiquitin Proteasome System upon proteotoxic stress
Source: PubMed Central journal article supplement (PMC6197266; doi:10.1038/s41467-018-06365-0), 2018-10-22
Supplement: 41467_2018_6365_MOESM3_ESM.pdf [file 41467_2018_6365_MOESM3_ESM.pdf]

## Description of Additional Supplementary Files

**File Name:** Supplementary Data 1

**Description:** Effect of siNEDD8 and MLN4924 on the composition of heat-shock induced aggregates analyzed by SILAC mass spectrometry-based proteomics.
